# Supplementary material for: Metabolic Potential of Epichloë Endophytes for Host Grass Fungal Disease Resistance
Source: MDPI journal article supplement (doi:10.3390/microorganisms10010064), 2021-12-29
Supplement: s1 [file s1]

# Supplementary Materials: Metabolic potential of *Epichloë* endophytes for host grass disease resistance

Krishni Fernando, Priyanka Reddy, Simone J. Rochfort, German C. Spangenberg and Kathryn M. Guthridge

**Supplementary Table S1:** List of peer reviewed scientific reports in the last 25 years (1996 – 2021) with the terms “*Epichloë*” OR “*Neotyphodium*” AND “fungitoxic” OR “antifungal” in the title, abstract, or keywords

| First author name | Year | Title                                                                                                                                                                                                | Source title                               | Cited | Source |
|-------------------|------|------------------------------------------------------------------------------------------------------------------------------------------------------------------------------------------------------|--------------------------------------------|-------|--------|
| Wang, Y.          | 2021 | Preliminary evaluation of the disease resistance of <i>Festuca sinensis</i> infected by <i>Epichloë sinensis</i>                                                                                     | Journal of Phytopathology                  | 1     | Scopus |
| Kou, M. Z.        | 2021 | The plant salicylic acid signalling pathway regulates the infection of a biotrophic pathogen in grasses associated with an <i>Epichloë</i> endophyte                                                 | Journal of Fungi                           | 2     | Scopus |
| Wang, R.          | 2021 | The <i>Epichloë festucae</i> antifungal protein efe-AfpA is also a possible effector protein required for the interaction of the fungus with its host grass <i>Festuca rubra</i> subsp. <i>rubra</i> | Microorganisms                             | 1     | Scopus |
| Li, F.            | 2020 | Effects of the fungal endophyte <i>Epichloë festucae</i> var. <i>lolii</i> on growth and physiological responses of perennial ryegrass cv. fairway to combined drought and pathogen stresses         | Microorganisms                             | 2     | Scopus |
| Shi, X.           | 2020 | Endophytic fungi activated similar defense strategies of <i>Achnatherum sibiricum</i> host to different trophic types of pathogens                                                                   | Frontiers in Microbiology                  | 3     | Scopus |
| Fernando, K.      | 2020 | Novel antifungal activity of <i>Lolium</i> -associated <i>Epichloë</i> endophytes                                                                                                                    | Microorganisms                             | 4     | Scopus |
| Purev, E.         | 2020 | Identification of $\epsilon$ -Poly-L-lysine as an antimicrobial product from an <i>Epichloë</i> endophyte and isolation of fungal $\epsilon$ -PL synthetase gene                                     | Molecules                                  | 8     | Scopus |
| Song Q. Y.        | 2020 | Do <i>Epichloë</i> endophytes and their grass symbiosis only produce toxic alkaloids to insects and livestock?                                                                                       | Journal of Agricultural and Food Chemistry | 4     | Scopus |
| Guo, Y.           | 2019 | Effects of AM fungi and grass endophytes on perennial ryegrass <i>Bipolaris sorokiniana</i> leaf spot disease under limited soil nutrients                                                           | European Journal of Plant Pathology        | 5     | Scopus |
| Twarużek, M.      | 2019 | Evaluation of cytotoxicity and mould contamination of selected plants from meadows covered by the agri-environmental program                                                                         | Toxins                                     | 1     | Scopus |
| Qin, J.           | 2019 | Endophyte infection and methyl jasmonate treatment increased the resistance of <i>Achnatherum sibiricum</i> to insect herbivores independently                                                       | Toxins                                     | 9     | Scopus |
| Kauppinen, M.     | 2018 | <i>Epichloë</i> endophyte effects on leaf blotch pathogen ( <i>Rhynchosporium</i> sp.) of tall fescue ( <i>Schedonorus phoenix</i> ) vary among grass origin and environmental conditions            | Plant Ecology and Diversity                | 4     | Scopus |
| Chen, W.          | 2017 | The advantages of endophyte-infected over uninfected tall fescue in the growth and pathogen resistance are counteracted by elevated CO <sub>2</sub>                                                  | Scientific Reports                         | 9     | Scopus |
| Tian, Z.          | 2017 | The <i>Epichloë festucae</i> antifungal protein has activity against the plant pathogen <i>Sclerotinia homoeocarpa</i> , the causal agent of dollar spot disease                                     | Scientific Reports                         | 20    | Scopus |
| Iannone, L.J.     | 2017 | Seed-transmitted <i>Epichloë</i> sp. endophyte alleviates the negative effects of head smut of grasses ( <i>Ustilago bullata</i> ) on <i>Bromus auleticus</i>                                        | Fungal Ecology                             | 9     | Scopus |

|                    |      |                                                                                                                                                                                                                         |                                              |     |                       |
|--------------------|------|-------------------------------------------------------------------------------------------------------------------------------------------------------------------------------------------------------------------------|----------------------------------------------|-----|-----------------------|
| Perez, L.I.        | 2017 | Symbiosis with systemic fungal endophytes promotes host escape from vector-borne disease                                                                                                                                | Oecologia                                    | 8   | Scopus                |
| Xia, C.            | 2016 | An <i>Epichloë</i> endophyte improves photosynthetic ability and dry matter production of its host <i>Achnatherum inebrians</i> infected by <i>Blumeria graminis</i> under various soil water conditions                | Fungal Ecology                               | 41  | Scopus                |
| Wang, X.           | 2016 | Pathogen resistant advantage of endophyte-infected over endophyte-free <i>Leymus chinensis</i> is strengthened by pre-drought treatment                                                                                 | European Journal of Plant Pathology          | 23  | Scopus                |
| Lugtenberg, B.J.J. | 2016 | Fungal endophytes for sustainable crop production                                                                                                                                                                       | FEMS Microbiology Ecology                    | 111 | Scopus                |
| Pérez, L. I.       | 2016 | Can the defensive mutualism between grasses and fungal endophytes protect non-symbiotic neighbours from soil pathogens?                                                                                                 | Plant and Soil                               | 4   | Review/google scholar |
| Song, Q. Y.        | 2015 | Antifungal, phytotoxic, and cytotoxic activities of metabolites from <i>Epichloë bromicola</i> , a fungus obtained from <i>Elymus tangutorum</i> grass                                                                  | Journal of Agricultural and Food Chemistry   | 29  | Scopus                |
| Zhou, L.Y.         | 2015 | Antifungal activity and phytochemical investigation of the asexual endophyte of <i>Epichloë</i> sp. from <i>Festuca sinensis</i>                                                                                        | Science China Life Sciences                  | 18  | Scopus                |
| Zhang, X.X.        | 2015 | Chemical composition and antifungal activity of the volatile oil from <i>Epichloë gansuensis</i> , endophyte-infected and non-infected <i>Achnatherum inebrians</i>                                                     | Science China Life Sciences                  | 6   | Scopus                |
| Ma, M.             | 2015 | Effects of the endophyte <i>Epichloë festucae</i> var. <i>lolii</i> of perennial ryegrass ( <i>Lolium perenne</i> ) on indicators of oxidative stress from pathogenic fungi during seed germination and seedling growth | European Journal of Plant Pathology          | 36  | Scopus                |
| Xia, C.            | 2015 | <i>Epichloë</i> endophyte affects the ability of powdery mildew ( <i>Blumeria graminis</i> ) to colonise drunken horse grass ( <i>Achnatherum inebrians</i> )                                                           | Fungal Ecology                               | 37  | Scopus                |
| Wiewióra, B.       | 2015 | Endophyte-mediated disease resistance in wild populations of perennial ryegrass ( <i>Lolium perenne</i> )                                                                                                               | Fungal Ecology                               | 34  | Scopus                |
| Niones J.T.        | 2015 | VibA, a homologue of a transcription factor for fungal heterokaryon incompatibility, is involved in antifungal compound production in the plant-symbiotic fungus <i>Epichloë festucae</i>                               | Eukaryotic Cell                              | 12  | Scopus                |
| Zhang, X. X.       | 2015 | Effects of symbiotic <i>Epichloë gansuensis</i> endophyte on drunken horse grass ( <i>Achnatherum inebrians</i> ) growth and seed production                                                                            | New Zealand Journal of Agricultural Research | 8   | Review/google scholar |
| Zhang, X.X.        | 2014 | Antifungal activity of petroleum ether extracts from <i>Achnatherum inebrians</i> infected with <i>Neotyphodium gansuense</i>                                                                                           | Science China Life Sciences                  | 4   | Scopus                |
| Tanentzap, A.J.    | 2014 | Ungulate saliva inhibits a grass-endophyte mutualism                                                                                                                                                                    | Biology Letters                              | 6   | Scopus                |
| Niones, J.T.       | 2014 | An isolate of <i>Epichloë festucae</i> , an endophytic fungus of temperate grasses, has growth inhibitory activity against selected grass pathogens                                                                     | Journal of General Plant Pathology           | 23  | Scopus                |
| Pańka, D.          | 2013 | Occurrence of <i>Neotyphodium</i> and <i>Epichloë</i> fungi in meadow fescue and red fescue in Poland and screening of endophyte isolates as potential biological control agents                                        | Acta Scientiarum Polonorum, Hortorum Cultus  | 7   | Scopus                |
| Pańka, D.          | 2013 | Susceptibility of tall fescue to <i>Rhizoctonia zeae</i> infection as affected by endophyte symbiosis                                                                                                                   | Annals of Applied Biology                    | 20  | Scopus                |
| Pańka, D.          | 2013 | Production of phenolics and the emission of volatile organic compounds by perennial ryegrass ( <i>Lolium perenne</i> L.)/ <i>Neotyphodium lolii</i> association as a response to infection by <i>Fusarium poae</i>      | Journal of Plant Physiology                  | 61  | Scopus                |

|                   |      |                                                                                                                                                   |                                            |     |                       |
|-------------------|------|---------------------------------------------------------------------------------------------------------------------------------------------------|--------------------------------------------|-----|-----------------------|
| Sabzalian, M. R.  | 2012 | Reaction to powdery mildew fungus, <i>Blumeria graminis</i> in endophyte-infected and endophyte-free tall and meadow fescues                      | Australasian Plant Pathology               | 5   | Review/google scholar |
| Deshmukh, S.K.    | 2012 | Fungal endophytes: A potential source of antifungal compounds                                                                                     | Frontiers in Bioscience - Elite            | 14  | Scopus                |
| Pařka, D.         | 2011 | Effect of <i>Neotyphodium uncinatum</i> endophyte on meadow fescue yielding, health status and ergovaline production in host-plants               | Journal of Plant Protection Research       | 14  | Review/google scholar |
| Ren, An-Zhi       | 2009 | Difference in antifungal activity of morphotypes of clavicipitaceous endophytes within and between species                                        | Acta Ecologica Sinica                      | 1   | Review/google scholar |
| Tian, P.          | 2008 | Effect of the endophyte <i>Neotyphodium lolii</i> on susceptibility and host physiological response of perennial ryegrass to fungal pathogens     | European Journal of Plant Pathology        | 51  | Scopus                |
| Steinebrunner, F. | 2008 | Ecological role of volatiles produced by <i>Epichloë</i> : Differences in antifungal toxicity                                                     | FEMS Microbiology Ecology                  | 27  | Scopus                |
| Li, C.J.          | 2007 | Interactions of <i>Neotyphodium gansuense</i> , <i>Achnatherum inebrians</i> , and plant-pathogenic fungi                                         | Mycological Research                       | 45  | Scopus                |
| Seto, Y.          | 2007 | Novel cyclic peptide, epichlicin, from the endophytic fungus, <i>Epichloë typhina</i>                                                             | Bioscience, Biotechnology and Biochemistry | 34  | Scopus                |
| Clarke, B.B.      | 2006 | Endophyte-mediated suppression of dollar spot disease in fine fescues                                                                             | Plant Disease                              | 111 | Scopus                |
| Wäli, P.R.        | 2006 | Susceptibility of endophyte-infected grasses to winter pathogens (snow molds)                                                                     | Canadian Journal of Botany                 | 55  | Scopus                |
| Bonos, S. A.      | 2005 | Suppression of red thread in fine fescues through endophyte-mediated resistance                                                                   | Applied Turfgrass Science                  | 54  | Review/google scholar |
| Seto, Y.          | 2005 | Production of phleichrome by <i>Cladosporium phlei</i> as stimulated by diketopiperadines of <i>Epichloë typhina</i>                              | Bioscience, Biotechnology and Biochemistry | 14  | Scopus                |
| Hiatt, E.E.       | 2001 | Monoclonal antibodies incorporated into <i>Neotyphodium coenophialum</i> fungal cultures: Inhibition of fungal growth and stability of antibodies | Fungal Genetics and Biology                | 11  | Scopus                |
| Yue, Q.           | 2000 | Isolation and characterization of fungal inhibitors from <i>Epichloë festucae</i>                                                                 | Journal of Agricultural and Food Chemistry | 118 | Scopus                |
| Kanada, R.M.      | 1998 | Asymmetric hydrogen transfer protocol for enantiocontrolled synthesis of chokol G                                                                 | Chemical Communications                    | 23  | Scopus                |
| Christensen M.J.  | 1996 | Antifungal activity in grasses infected with <i>Acremonium</i> and <i>Epichloë</i> endophytes                                                     | Australasian Plant Pathology               | 55  | Scopus                |
